# Supplementary material for: Evolution of the T-Cell Receptor (TR) Loci in the Adaptive Immune Response: The Tale of the TRG Locus in Mammals
Source: MDPI journal article supplement (doi:10.3390/genes11060624), 2020-06-05
Supplement: s1 [file s1]

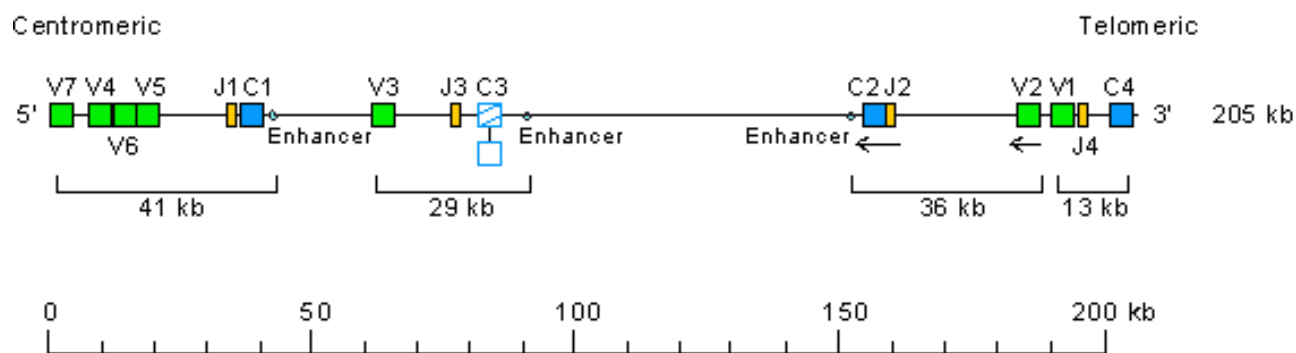

Supp. Fig. 3A

*Mus musculus* (with permission of IMGT® <http://www.imgt.org>)

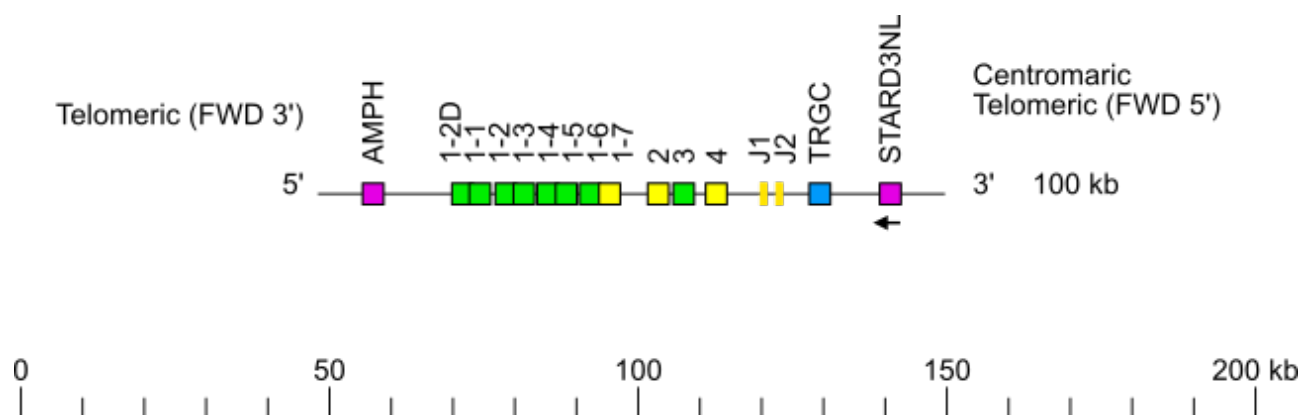

Supp. Fig. 3B

*Oryctolagus cuniculus* (with permission of IMGT® <http://www.imgt.org>)
