# Supplementary material for: Evolution of the T-Cell Receptor (TR) Loci in the Adaptive Immune Response: The Tale of the TRG Locus in Mammals
Source: MDPI journal article supplement (doi:10.3390/genes11060624), 2020-06-05
Supplement: s1 [file s1]

**Supplementary Table 1.** Ratio functional/total TRGV, TRGJ and TRGC genes

| <i>Gene</i>                    | <i>Functionality</i> | <i>Ovis aries</i> | <i>Bos taurus</i> | <i>Camelus dromedarius</i> | <i>Tursiops truncatus</i> | <i>Canis lupus familiaris</i> | <i>Felis catus</i> |
|--------------------------------|----------------------|-------------------|-------------------|----------------------------|---------------------------|-------------------------------|--------------------|
| <b>TRGV</b>                    | F                    | 11                | 16                | 6                          | 2                         | 7                             | 6                  |
|                                | ORF                  |                   |                   | 1                          |                           | 1                             |                    |
|                                | P                    | 2                 | 1                 |                            |                           | 8                             | 6                  |
| <b>TRGJ</b>                    | F                    | 10                | 10                | 4                          | 3                         | 10                            | 6                  |
|                                | ORF                  |                   |                   |                            |                           |                               |                    |
|                                | P                    | 3                 |                   | 3                          |                           | 6                             | 6                  |
| <b>TRGC</b>                    | F                    | 6                 | 6                 | 3                          | 1                         | 6                             | 4                  |
|                                | ORF                  |                   |                   |                            |                           | 1                             |                    |
|                                | P                    |                   | 1                 |                            |                           | 1                             | 2                  |
| <b>Total</b>                   |                      | 32                | 34                | 17                         | 6                         | 40                            | 30                 |
| <b>Ratio Functional /total</b> |                      | 27/32<br>0,77     | 32/34<br>0,94     | 13/17<br>0,76              | 6/6<br>1                  | 23/40<br>0,57                 | 16/30<br>0,53      |
