# Supplementary material for: Evolution of the T-Cell Receptor (TR) Loci in the Adaptive Immune Response: The Tale of the TRG Locus in Mammals
Source: MDPI journal article supplement (doi:10.3390/genes11060624), 2020-06-05
Supplement: s1 [file s1]

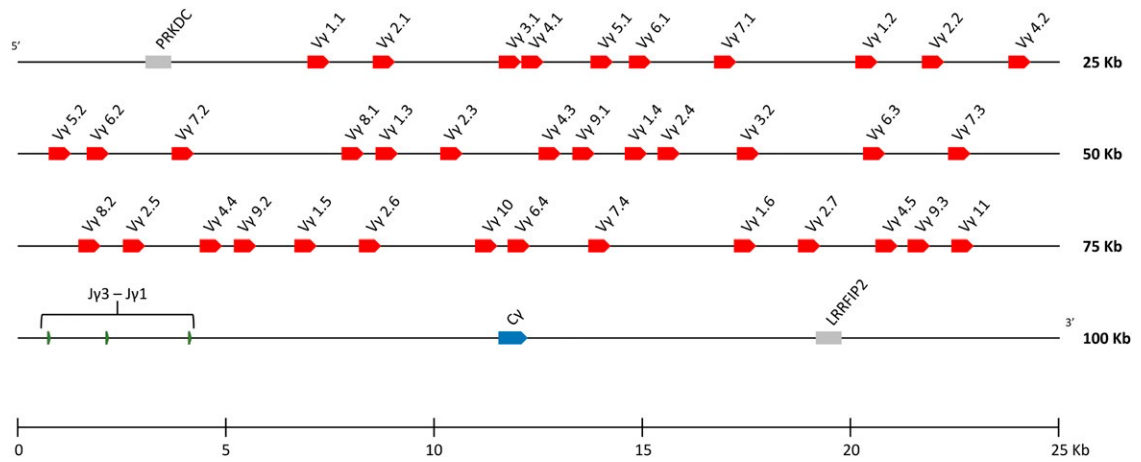

Supp. Fig. 1A  
*Gallus gallus* (Liu et al., 2020)

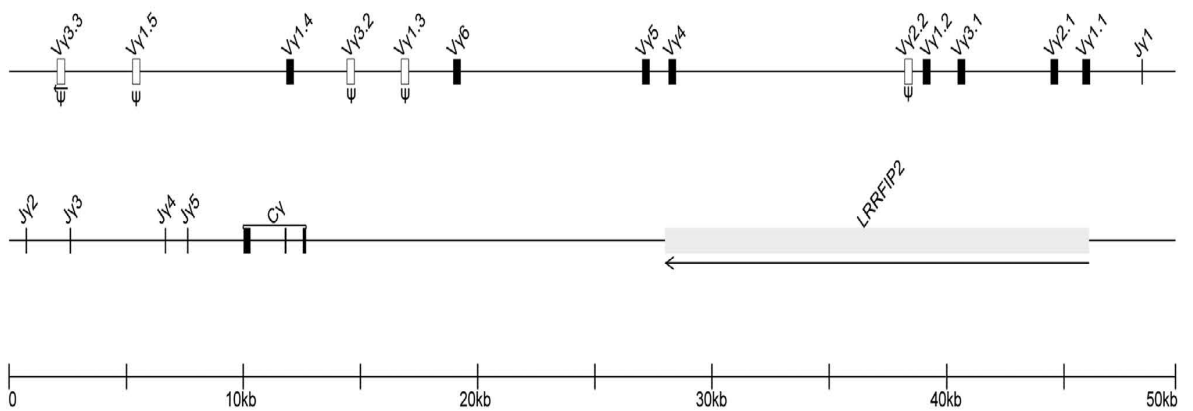

Supp. Fig. 1B  
*Anas platyrhynchos domesticus* (Yang et al., 2017)

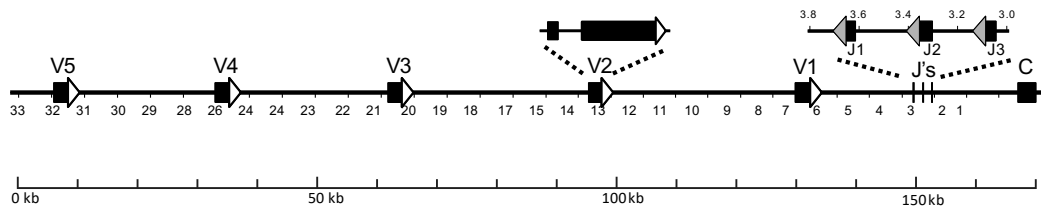

Supp. Fig. 1C  
*Carcharhinus plumbeus* (Chen et al., 2009)

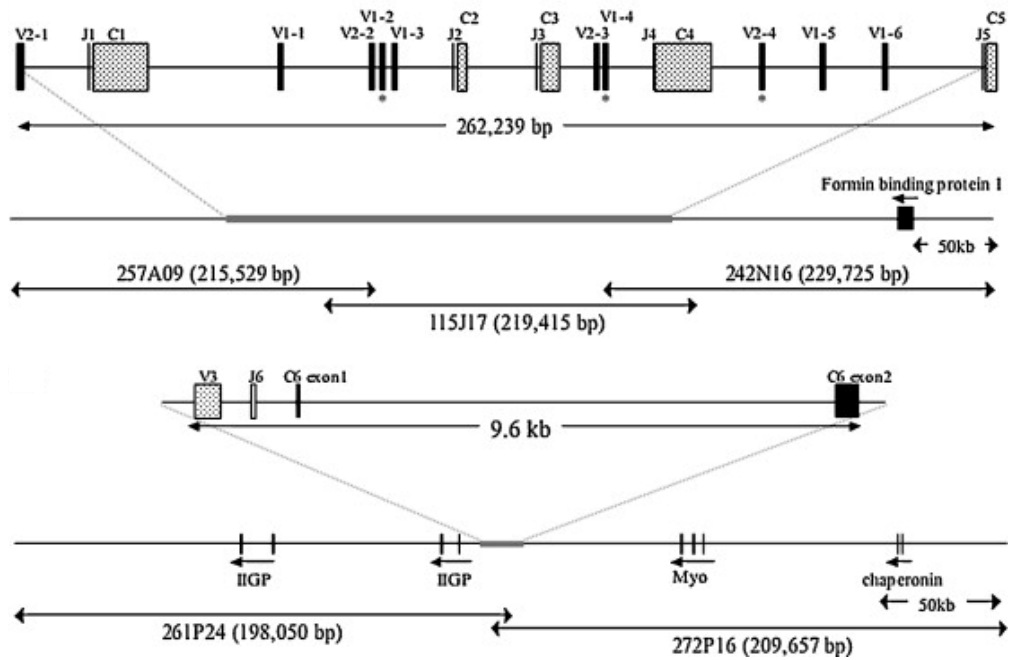

Supp. Fig. 1D  
TCR $\gamma$  1 (upper) and TCR $\gamma$  2 (lower) locus *Salmo salar* (Yazawa et al., 2008)

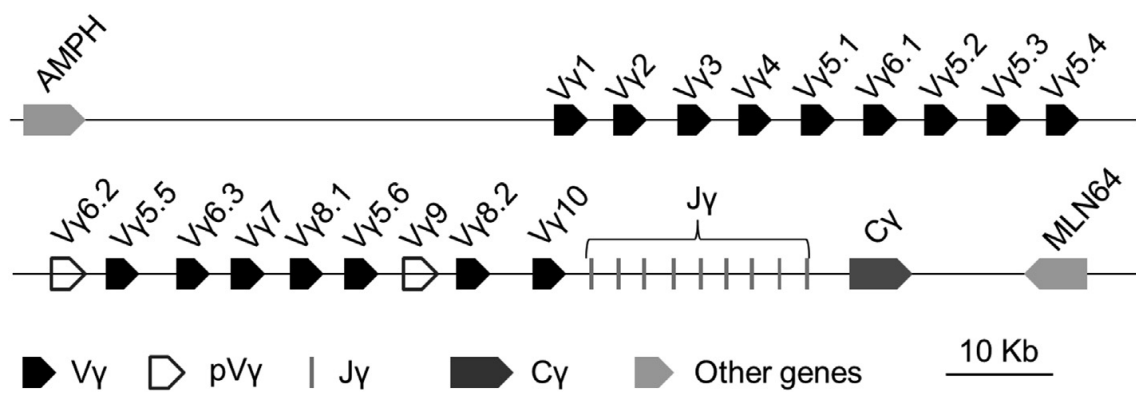

Supp. Fig. 1E  
*Alligator sinensis* (Wang et al., 2018)

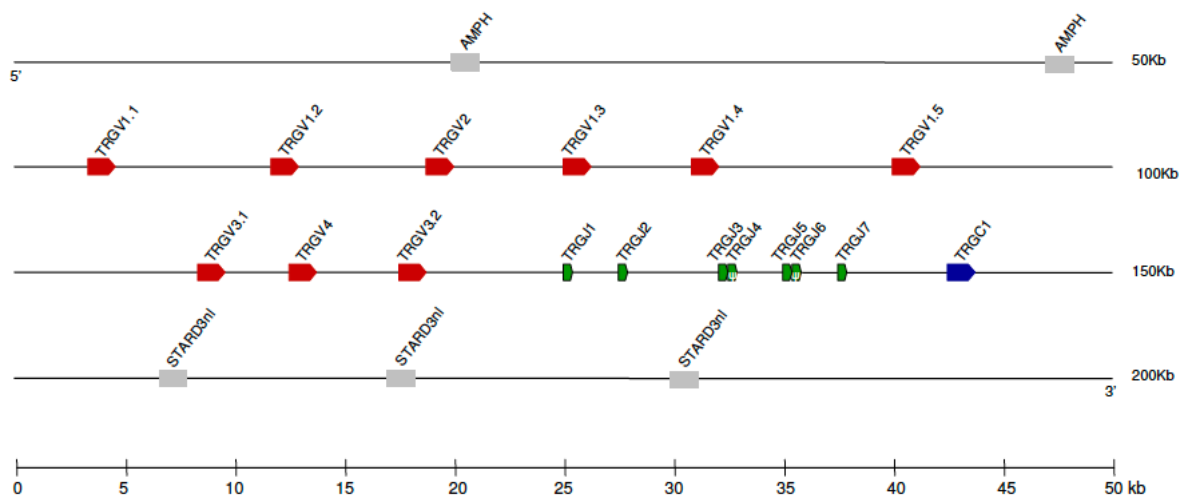

Supp. Fig. 1F  
*Monodelphis domestica* (Parra et al., 2008)
