# Supplementary material for: Evolution of the T-Cell Receptor (TR) Loci in the Adaptive Immune Response: The Tale of the TRG Locus in Mammals
Source: MDPI journal article supplement (doi:10.3390/genes11060624), 2020-06-05
Supplement: s1 [file s1]

**TRG1 (4q3.1)**

(NW\_937068) (AY644517 v.2)

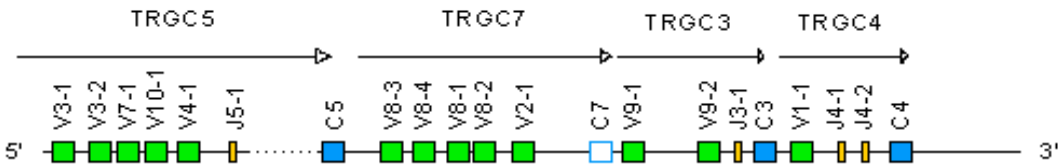

**TRG2 (4q1.5-2.2)**

(AY644518)

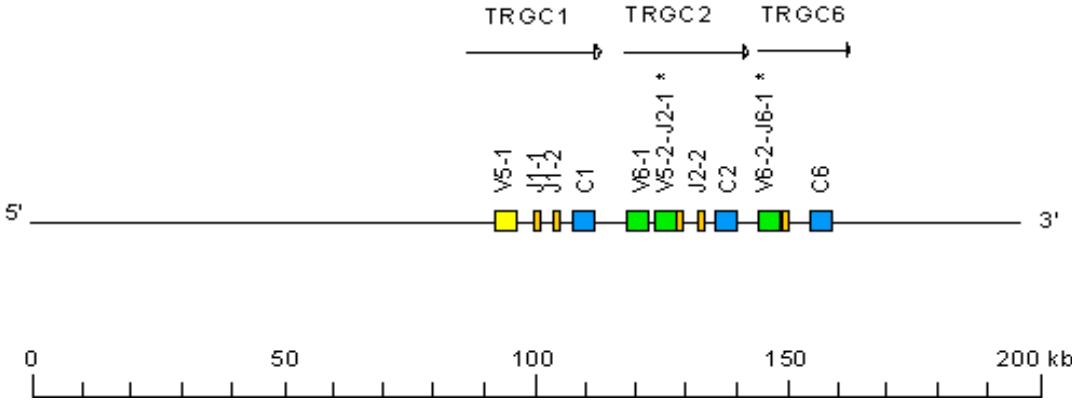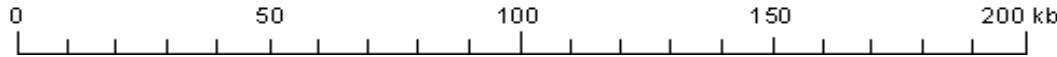

Supp. Fig. 2A  
*Bos taurus* (with permission of IMGT® <http://www.imgt.org>)

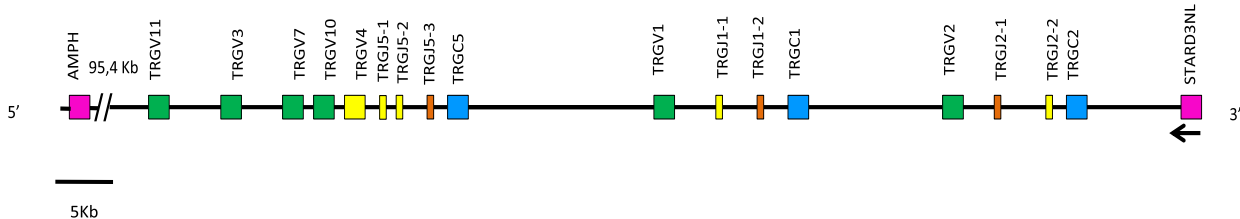

Supp. Fig. 2B  
*Camelus dromedarius* (Antonacci et al., 2020)

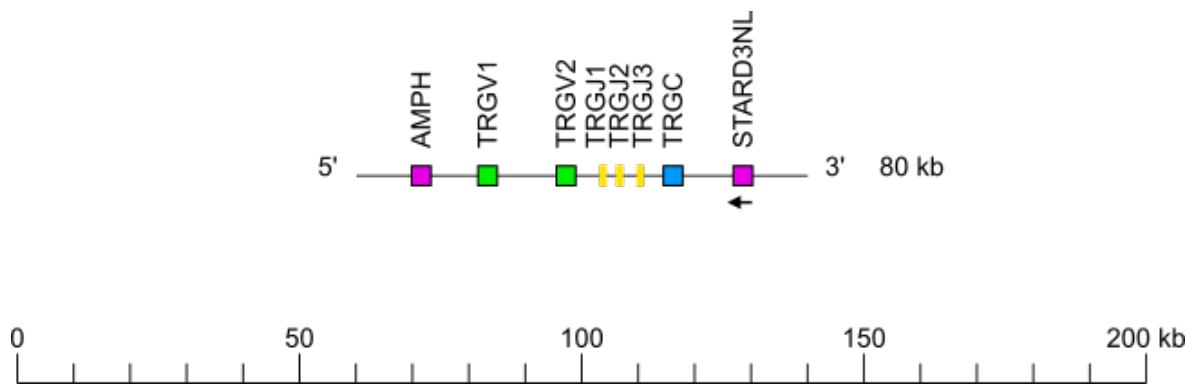

Supp. Fig. 2C

*Tursiops truncatus* (with permission of IMGT® <http://www.imgt.org>)

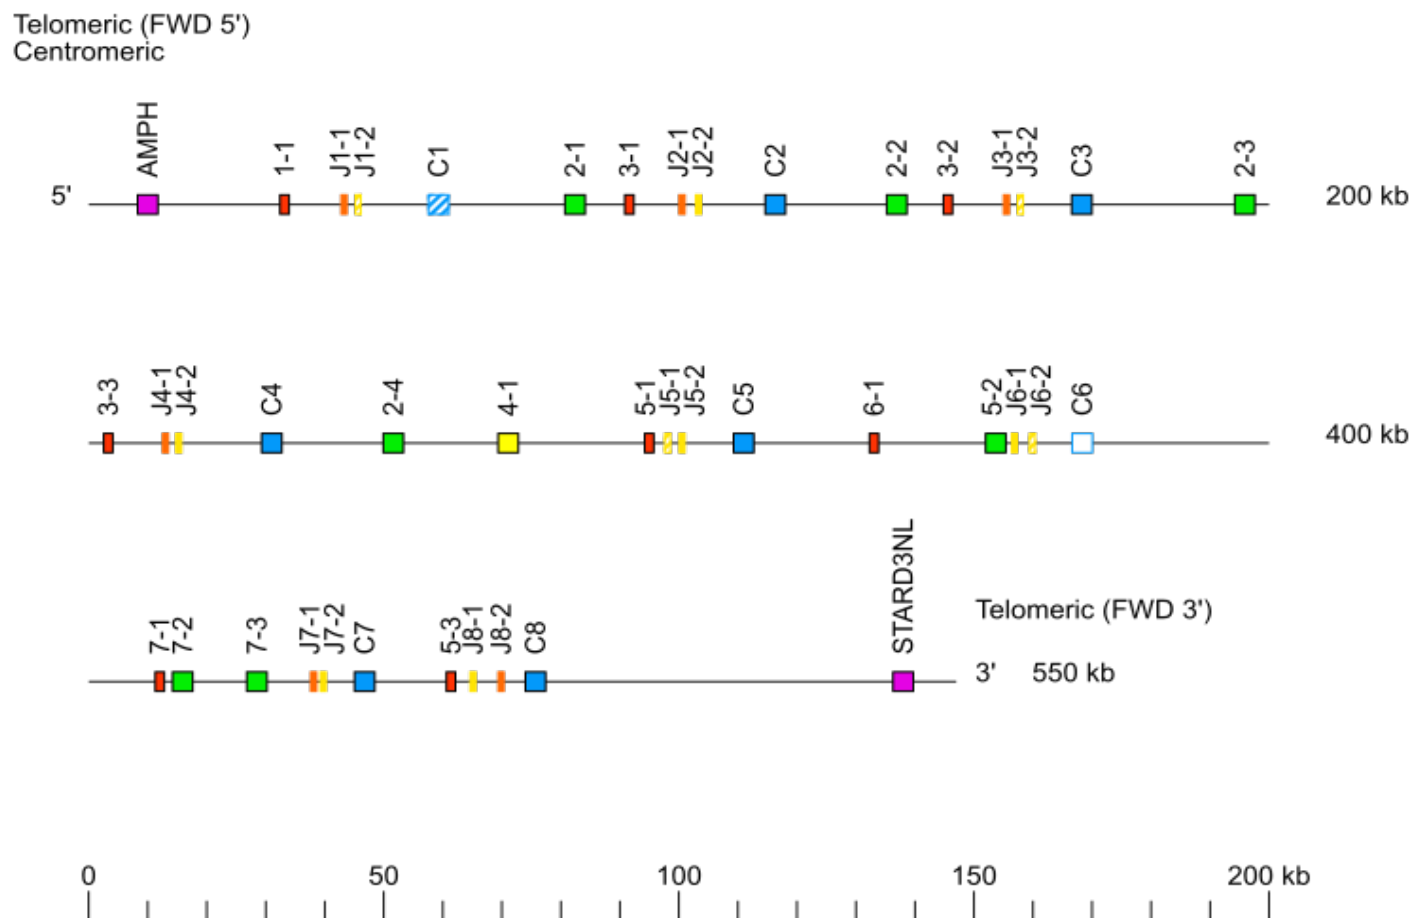

Supp. Fig. 2D

*Canis lupus familiaris* (with permission of IMGT® <http://www.imgt.org>)

Telomeric (FWD 5')  
Centromeric

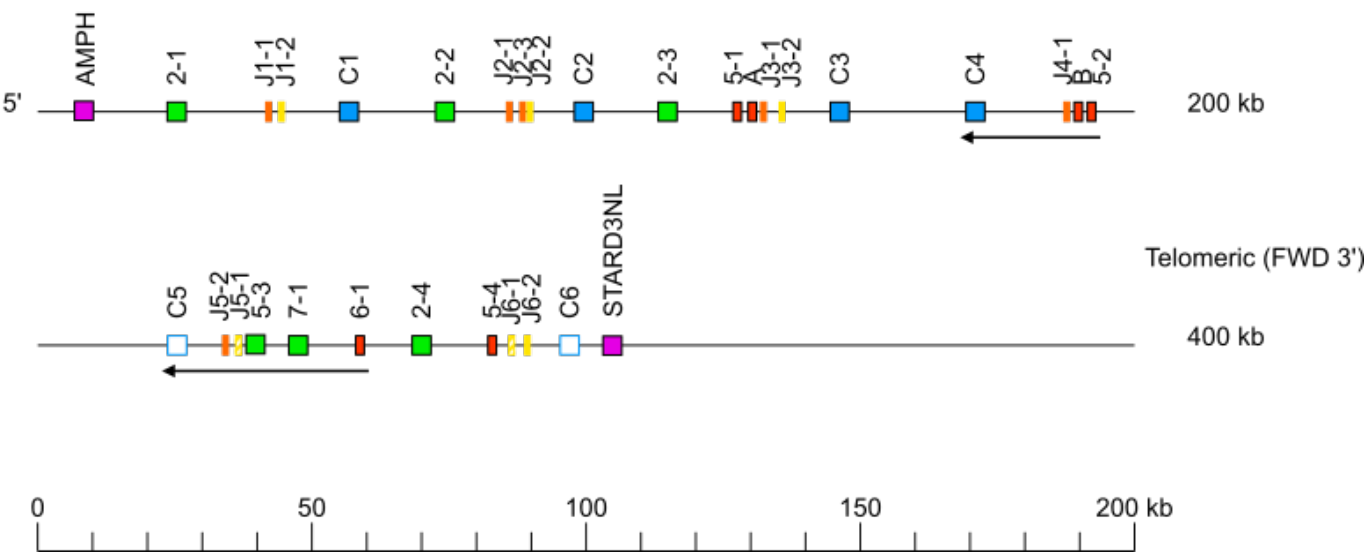

Supp. Fig. 2E  
*Felis catus* (with permission of IMGT® <http://www.imgt.org>)
